# Supplementary material
Source: publisher figshare collection journal article supplement (https://acs.figshare.com/ndownloader/files/6904535)
Supplement: Supplementary file 1 [file 6904535]

data_dt-1-a
_audit_creation_date              2016-01-22
_audit_creation_method
;
  Olex2 1.1
  (compiled Nov  1 2011 20:42:30, GUI svn.r3906)
;
_publ_contact_author_address      ?
_publ_contact_author_email        ?
_publ_contact_author_name         ''
_publ_contact_author_phone        ?
_chemical_name_common             ?
_chemical_name_systematic
;
 ? 
;
_chemical_formula_moiety          'C31 H20 N2 O S2'
_chemical_formula_sum             'C31 H20 N2 O S2'
_chemical_formula_weight          500.61
_chemical_melting_point           ?
loop_
  _atom_type_symbol
  _atom_type_description
  _atom_type_scat_dispersion_real
  _atom_type_scat_dispersion_imag
  _atom_type_scat_source
 'C' 'C' 0.0033 0.0016 'International Tables Vol C Tables 4.2.6.8 and 6.1.1.4'
 'H' 'H' 0.0000 0.0000 'International Tables Vol C Tables 4.2.6.8 and 6.1.1.4'
 'N' 'N' 0.0061 0.0033 'International Tables Vol C Tables 4.2.6.8 and 6.1.1.4'
 'O' 'O' 0.0106 0.0060 'International Tables Vol C Tables 4.2.6.8 and 6.1.1.4'
 'S' 'S' 0.1246 0.1234 'International Tables Vol C Tables 4.2.6.8 and 6.1.1.4'

_space_group_crystal_system       'monoclinic'
_space_group_IT_number            14
_space_group_name_H-M_alt         'P 1 21/n 1'
_space_group_name_Hall            '-P 2yn'
loop_
  _space_group_symop_id
  _space_group_symop_operation_xyz
 1 'x, y, z'
 2 '-x+1/2, y+1/2, -z+1/2'
 3 '-x, -y, -z'
 4 'x-1/2, -y-1/2, z-1/2'

_cell_length_a                    10.1603(3)
_cell_length_b                    18.4764(5)
_cell_length_c                    12.9632(3)
_cell_angle_alpha                 90.00
_cell_angle_beta                  92.126(2)
_cell_angle_gamma                 90.00
_cell_volume                      2431.85(11)
_cell_formula_units_Z             4
_cell_measurement_reflns_used     8085
_cell_measurement_temperature     296(2)
_cell_measurement_theta_max       23.189
_cell_measurement_theta_min       2.289
_exptl_absorpt_coefficient_mu     0.247
_exptl_absorpt_correction_T_max   1
_exptl_absorpt_correction_T_min   0.834077
_exptl_absorpt_correction_type    multi-scan
_exptl_absorpt_process_details
;
SADABS-2004/1 (Bruker,2004) was used for absorption correction.
R(int) was 0.0704 before and 0.0303 after correction.
The Ratio of minimum to maximum transmission is 0.8341.
The \l/2 correction factor is 0.0015.
;
_exptl_crystal_colour             Red
_exptl_crystal_density_diffrn     1.367
_exptl_crystal_density_meas       ?
_exptl_crystal_density_method     'not measured'
_exptl_crystal_description        Block
_exptl_crystal_F_000              1040
_exptl_crystal_size_max           0.32
_exptl_crystal_size_mid           0.24
_exptl_crystal_size_min           0.12
_exptl_special_details
;
 ? 
;
_diffrn_reflns_av_R_equivalents   0.0369
_diffrn_reflns_av_unetI/netI      0.0278
_diffrn_reflns_limit_h_max        12
_diffrn_reflns_limit_h_min        -11
_diffrn_reflns_limit_k_max        21
_diffrn_reflns_limit_k_min        -21
_diffrn_reflns_limit_l_max        14
_diffrn_reflns_limit_l_min        -15
_diffrn_reflns_number             31332
_diffrn_reflns_theta_full         25.25
_diffrn_reflns_theta_max          25.25
_diffrn_reflns_theta_min          1.92
_diffrn_ambient_temperature       569(2)
_diffrn_detector_area_resol_mean  ?
_diffrn_measured_fraction_theta_full 0.985
_diffrn_measured_fraction_theta_max 0.985
_diffrn_measurement_device_type   'CCD area detector'
_diffrn_measurement_method        'phi and omega scans'
_diffrn_radiation_monochromator   graphite
_diffrn_radiation_type            'MO K\a'
_diffrn_radiation_wavelength      0.71073
_diffrn_source                    'fine-focus sealed tube'
_diffrn_source_current            30.0
_diffrn_source_power              1.35
_diffrn_source_voltage            45.0
_diffrn_standards_decay_%         ?
_diffrn_standards_interval_count  ?
_diffrn_standards_interval_time   ?
_diffrn_standards_number          ?
_reflns_number_gt                 3288
_reflns_number_total              4339
_reflns_threshold_expression      >2sigma(I)
_computing_cell_refinement        ?
_computing_data_collection        ?
_computing_data_reduction         'SAINT v7.34A (Bruker, 200?)'
_computing_molecular_graphics
;
O. V. Dolomanov, L. J. Bourhis, R. J. Gildea, J. A. K. Howard and H. Puschmann,
OLEX2: a complete structure solution, refinement and analysis program.
J. Appl. Cryst. (2009). 42, 339-341.
;
_computing_publication_material
;
O. V. Dolomanov, L. J. Bourhis, R. J. Gildea, J. A. K. Howard and H. Puschmann,
OLEX2: a complete structure solution, refinement and analysis program.
J. Appl. Cryst. (2009). 42, 339-341.
;
_computing_structure_refinement
;
olex2.refine (L.J. Bourhis, O.V. Dolomanov, R.J. Gildea, J.A.K. Howard,
H. Puschmann, in preparation, 2011)
;
_computing_structure_solution     'SHELXS-97 (Sheldrick, 1990)'
_refine_diff_density_max          0.205
_refine_diff_density_min          -0.250
_refine_diff_density_rms          0.044
_refine_ls_extinction_coef        ?
_refine_ls_extinction_method      none
_refine_ls_goodness_of_fit_ref    1.067
_refine_ls_hydrogen_treatment     mixed
_refine_ls_matrix_type            full
_refine_ls_number_parameters      326
_refine_ls_number_reflns          4339
_refine_ls_number_restraints      0
_refine_ls_R_factor_all           0.0565
_refine_ls_R_factor_gt            0.0401
_refine_ls_restrained_S_all       1.067
_refine_ls_shift/su_max           0.001
_refine_ls_shift/su_mean          0.000
_refine_ls_structure_factor_coef  Fsqd
_refine_ls_weighting_details
'calc w=1/[\s^2^(Fo^2^)+(0.0800P)^2^+0.0000P] where P=(Fo^2^+2Fc^2^)/3'
_refine_ls_weighting_scheme       calc
_refine_ls_wR_factor_gt           0.1158
_refine_ls_wR_factor_ref          0.1268
_refine_special_details
;
 Refinement of F^2^ against ALL reflections.  The weighted R-factor wR and 
 goodness of fit S are based on F^2^, conventional R-factors R are based 
 on F, with F set to zero for negative F^2^. The threshold expression of 
 F^2^ > 2sigma(F^2^) is used only for calculating R-factors(gt) etc. and is 
 not relevant to the choice of reflections for refinement.  R-factors based 
 on F^2^ are statistically about twice as large as those based on F, and R- 
 factors based on ALL data will be even larger. 
;
_atom_sites_solution_hydrogens    geom
_atom_sites_solution_primary      direct
_atom_sites_solution_secondary    difmap
loop_
  _atom_site_label
  _atom_site_type_symbol
  _atom_site_fract_x
  _atom_site_fract_y
  _atom_site_fract_z
  _atom_site_U_iso_or_equiv
  _atom_site_adp_type
  _atom_site_occupancy
  _atom_site_symmetry_multiplicity
  _atom_site_calc_flag
  _atom_site_refinement_flags
  _atom_site_disorder_assembly
  _atom_site_disorder_group
 S1 S 0.03202(5) 0.08230(3) 0.32668(4) 0.04919(18) Uani 1 1 d . . .
 S2 S 0.27730(6) -0.03276(3) 0.56714(4) 0.0602(2) Uani 1 1 d . . .
 O1 O 0.42669(14) 0.13792(7) 1.13898(10) 0.0559(4) Uani 1 1 d . . .
 N2 N 0.28730(16) 0.01088(9) 0.67484(13) 0.0513(4) Uani 1 1 d . . .
 N1 N 0.18010(17) 0.01878(9) 0.49880(13) 0.0523(4) Uani 1 1 d . . .
 C2 C 0.37540(19) 0.13088(10) 1.04067(14) 0.0437(5) Uani 1 1 d . . .
 C14 C 0.00556(19) 0.14151(10) 0.42720(14) 0.0455(5) Uani 1 1 d . . .
 C11 C 0.06358(19) 0.13331(9) 0.53122(14) 0.0432(5) Uani 1 1 d . . .
 C3 C 0.4432(2) 0.10387(11) 0.95787(15) 0.0502(5) Uani 1 1 d . . .
 H3 H 0.5300 0.0884 0.9674 0.060 Uiso 1 1 calc R . .
 C9 C 0.21000(19) 0.07011(10) 0.66200(14) 0.0423(4) Uani 1 1 d . . .
 C6 C 0.18585(19) 0.14943(11) 0.92830(15) 0.0482(5) Uani 1 1 d . . .
 H6 H 0.0990 0.1648 0.9193 0.058 Uiso 1 1 calc R . .
 C17 C -0.06489(19) 0.13224(10) 0.24058(15) 0.0471(5) Uani 1 1 d . . .
 C8 C 0.18720(18) 0.12379(10) 0.73894(14) 0.0420(5) Uani 1 1 d . . .
 C18 C -0.0921(2) 0.10576(11) 0.13647(15) 0.0484(5) Uani 1 1 d . . .
 H18 H -0.0899 0.0558 0.1286 0.058 Uiso 1 1 calc R . .
 C10 C 0.14879(19) 0.07441(9) 0.56082(14) 0.0420(5) Uani 1 1 d . . .
 C4 C 0.38118(19) 0.10003(11) 0.86134(15) 0.0494(5) Uani 1 1 d . . .
 H4 H 0.4274 0.0815 0.8066 0.059 Uiso 1 1 calc R . .
 C5 C 0.25173(18) 0.12294(10) 0.84316(14) 0.0423(5) Uani 1 1 d . . .
 C12 C 0.0420(2) 0.18238(10) 0.60845(15) 0.0499(5) Uani 1 1 d . . .
 H12 H -0.0148 0.2209 0.5941 0.060 Uiso 1 1 calc R . .
 C7 C 0.24607(19) 0.15333(11) 1.02470(15) 0.0496(5) Uani 1 1 d . . .
 H7 H 0.1997 0.1712 1.0798 0.059 Uiso 1 1 calc R . .
 C13 C 0.10095(19) 0.17752(10) 0.70798(15) 0.0481(5) Uani 1 1 d . . .
 H13 H 0.0803 0.2129 0.7559 0.058 Uiso 1 1 calc R . .
 C15 C -0.0771(2) 0.19643(11) 0.39259(15) 0.0549(6) Uani 1 1 d . . .
 H15 H -0.1039 0.2339 0.4349 0.066 Uiso 1 1 calc R . .
 C16 C -0.1167(2) 0.19090(11) 0.28931(15) 0.0560(6) Uani 1 1 d . . .
 H16 H -0.1730 0.2239 0.2563 0.067 Uiso 1 1 calc R . .
 C1 C 0.5601(2) 0.11632(14) 1.15833(19) 0.0752(7) Uani 1 1 d . . .
 H1A H 0.5689 0.0657 1.1437 0.113 Uiso 1 1 calc R . .
 H1B H 0.5847 0.1252 1.2294 0.113 Uiso 1 1 calc R . .
 H1C H 0.6164 0.1436 1.1149 0.113 Uiso 1 1 calc R . .
 C26 C -0.15269(19) 0.23375(11) -0.07731(15) 0.0507(5) Uani 1 1 d . . .
 C19 C -0.12026(18) 0.14403(10) 0.04952(14) 0.0446(5) Uani 1 1 d . . .
 C27 C -0.10832(18) 0.22223(11) 0.02582(15) 0.0464(5) Uani 1 1 d . . .
 C25 C -0.19334(19) 0.16387(12) -0.12215(15) 0.0511(5) Uani 1 1 d . . .
 C20 C -0.16985(19) 0.11005(11) -0.04795(14) 0.0458(5) Uani 1 1 d . . .
 C28 C -0.0519(2) 0.27981(11) 0.08175(18) 0.0589(6) Uani 1 1 d . . .
 H28 H -0.0205 0.2732 0.1494 0.071 Uiso 1 1 calc R . .
 C21 C -0.1972(2) 0.03826(12) -0.07167(16) 0.0583(6) Uani 1 1 d . . .
 H21 H -0.1840 0.0024 -0.0220 0.070 Uiso 1 1 calc R . .
 C22 C -0.2439(2) 0.02078(15) -0.16923(19) 0.0705(7) Uani 1 1 d . . .
 H22 H -0.2609 -0.0274 -0.1857 0.085 Uiso 1 1 calc R . .
 C31 C -0.1447(2) 0.30141(13) -0.12258(19) 0.0670(6) Uani 1 1 d . . .
 H31 H -0.1759 0.3087 -0.1901 0.080 Uiso 1 1 calc R . .
 C30 C -0.0899(3) 0.35760(13) -0.0665(2) 0.0752(7) Uani 1 1 d . . .
 H30 H -0.0839 0.4031 -0.0965 0.090 Uiso 1 1 calc R . .
 C24 C -0.2419(2) 0.14571(14) -0.22089(17) 0.0684(7) Uani 1 1 d . . .
 H24 H -0.2577 0.1812 -0.2706 0.082 Uiso 1 1 calc R . .
 C23 C -0.2662(3) 0.07336(16) -0.24303(19) 0.0764(7) Uani 1 1 d . . .
 H23 H -0.2979 0.0602 -0.3086 0.092 Uiso 1 1 calc R . .
 C29 C -0.0435(2) 0.34723(13) 0.0343(2) 0.0736(7) Uani 1 1 d . . .
 H29 H -0.0062 0.3859 0.0708 0.088 Uiso 1 1 calc R . .

loop_
  _atom_site_aniso_label
  _atom_site_aniso_U_11
  _atom_site_aniso_U_22
  _atom_site_aniso_U_33
  _atom_site_aniso_U_23
  _atom_site_aniso_U_13
  _atom_site_aniso_U_12
 S1 0.0561(4) 0.0471(3) 0.0440(3) -0.0027(2) -0.0029(2) 0.0117(2)
 S2 0.0701(4) 0.0499(3) 0.0600(4) -0.0070(2) -0.0066(3) 0.0208(3)
 O1 0.0531(9) 0.0675(9) 0.0462(8) -0.0030(7) -0.0073(7) 0.0017(7)
 N2 0.0531(11) 0.0476(10) 0.0528(10) -0.0007(8) -0.0034(8) 0.0114(8)
 N1 0.0593(11) 0.0457(10) 0.0515(10) -0.0041(7) -0.0026(8) 0.0111(8)
 C2 0.0472(12) 0.0435(11) 0.0400(11) 0.0015(8) -0.0019(9) -0.0058(8)
 C14 0.0495(12) 0.0428(11) 0.0442(11) 0.0005(8) 0.0011(9) 0.0034(8)
 C11 0.0433(12) 0.0419(11) 0.0441(11) -0.0017(8) -0.0005(9) 0.0024(8)
 C3 0.0392(12) 0.0556(12) 0.0556(13) -0.0045(10) -0.0010(10) 0.0101(9)
 C9 0.0411(11) 0.0401(11) 0.0457(11) 0.0013(8) 0.0008(9) 0.0032(8)
 C6 0.0374(11) 0.0594(12) 0.0478(12) 0.0000(9) 0.0012(9) 0.0019(9)
 C17 0.0484(13) 0.0487(12) 0.0440(11) 0.0018(8) -0.0009(9) 0.0039(9)
 C8 0.0381(11) 0.0440(11) 0.0441(11) 0.0021(8) 0.0018(9) 0.0015(8)
 C18 0.0517(13) 0.0473(11) 0.0463(11) -0.0010(9) 0.0008(9) 0.0053(9)
 C10 0.0432(11) 0.0382(11) 0.0446(11) -0.0029(8) 0.0005(9) 0.0032(8)
 C4 0.0459(13) 0.0564(12) 0.0460(12) -0.0077(9) 0.0038(10) 0.0077(9)
 C5 0.0399(12) 0.0422(11) 0.0446(11) 0.0002(8) 0.0013(9) 0.0002(8)
 C12 0.0533(13) 0.0451(11) 0.0509(12) 0.0000(9) -0.0031(9) 0.0136(9)
 C7 0.0460(13) 0.0585(13) 0.0445(12) -0.0031(9) 0.0062(9) 0.0016(9)
 C13 0.0529(13) 0.0470(11) 0.0442(11) -0.0081(9) -0.0016(9) 0.0080(9)
 C15 0.0688(15) 0.0484(12) 0.0469(12) -0.0054(9) -0.0053(10) 0.0188(10)
 C16 0.0665(15) 0.0533(13) 0.0476(12) 0.0035(9) -0.0065(10) 0.0169(10)
 C1 0.0702(17) 0.0860(18) 0.0675(16) -0.0089(13) -0.0236(13) 0.0207(13)
 C26 0.0421(12) 0.0591(13) 0.0513(12) 0.0067(10) 0.0095(9) 0.0083(9)
 C19 0.0370(11) 0.0523(12) 0.0448(12) -0.0013(9) 0.0050(9) 0.0020(8)
 C27 0.0388(11) 0.0513(12) 0.0493(11) 0.0011(9) 0.0062(9) 0.0041(9)
 C25 0.0431(12) 0.0662(14) 0.0442(12) 0.0028(10) 0.0050(9) 0.0039(10)
 C20 0.0404(12) 0.0555(12) 0.0418(11) -0.0029(9) 0.0058(9) 0.0006(9)
 C28 0.0571(14) 0.0587(14) 0.0614(13) -0.0019(11) 0.0087(11) -0.0025(11)
 C21 0.0650(15) 0.0597(14) 0.0504(13) -0.0050(10) 0.0060(11) -0.0028(11)
 C22 0.0733(17) 0.0776(17) 0.0613(15) -0.0188(13) 0.0094(13) -0.0127(12)
 C31 0.0672(16) 0.0721(16) 0.0624(15) 0.0154(12) 0.0123(12) 0.0090(12)
 C30 0.0859(19) 0.0571(16) 0.0845(19) 0.0172(14) 0.0282(15) 0.0072(13)
 C24 0.0642(16) 0.0935(19) 0.0474(14) 0.0065(12) 0.0003(11) 0.0017(13)
 C23 0.0762(18) 0.105(2) 0.0478(14) -0.0187(14) 0.0012(12) -0.0099(15)
 C29 0.0760(17) 0.0542(15) 0.093(2) -0.0068(13) 0.0293(14) -0.0118(12)

_geom_special_details
;
 All esds (except the esd in the dihedral angle between two l.s. planes) 
 are estimated using the full covariance matrix.  The cell esds are taken 
 into account individually in the estimation of esds in distances, angles 
 and torsion angles; correlations between esds in cell parameters are only 
 used when they are defined by crystal symmetry.  An approximate (isotropic) 
 treatment of cell esds is used for estimating esds involving l.s. planes. 
;
loop_
  _geom_bond_atom_site_label_1
  _geom_bond_atom_site_label_2
  _geom_bond_distance
  _geom_bond_site_symmetry_2
  _geom_bond_publ_flag
 S1 C14 1.7300(19) . ?
 S1 C17 1.7277(19) . ?
 S2 N2 1.6121(17) . ?
 S2 N1 1.6132(17) . ?
 O1 C2 1.365(2) . ?
 O1 C1 1.426(3) . ?
 N2 C9 1.354(2) . ?
 N1 C10 1.350(2) . ?
 C2 C3 1.389(3) . ?
 C2 C7 1.386(3) . ?
 C14 C11 1.459(3) . ?
 C14 C15 1.381(3) . ?
 C11 C10 1.434(3) . ?
 C11 C12 1.374(3) . ?
 C3 C4 1.382(3) . ?
 C9 C8 1.431(3) . ?
 C9 C10 1.433(3) . ?
 C6 C5 1.400(3) . ?
 C6 C7 1.373(3) . ?
 C17 C18 1.452(3) . ?
 C17 C16 1.369(3) . ?
 C8 C5 1.480(3) . ?
 C8 C13 1.374(3) . ?
 C18 C19 1.352(3) . ?
 C4 C5 1.393(3) . ?
 C12 C13 1.405(3) . ?
 C15 C16 1.387(3) . ?
 C26 C27 1.411(2) . ?
 C26 C25 1.469(3) . ?
 C26 C31 1.385(3) . ?
 C19 C27 1.483(3) . ?
 C19 C20 1.482(3) . ?
 C27 C28 1.398(3) . ?
 C25 C20 1.398(3) . ?
 C25 C24 1.396(3) . ?
 C20 C21 1.387(3) . ?
 C28 C29 1.393(3) . ?
 C21 C22 1.373(3) . ?
 C22 C23 1.376(3) . ?
 C31 C30 1.373(3) . ?
 C30 C29 1.386(4) . ?
 C24 C23 1.387(3) . ?

loop_
  _geom_angle_atom_site_label_1
  _geom_angle_atom_site_label_2
  _geom_angle_atom_site_label_3
  _geom_angle
  _geom_angle_site_symmetry_1
  _geom_angle_site_symmetry_3
  _geom_angle_publ_flag
 C17 S1 C14 92.76(9) . . ?
 N2 S2 N1 101.42(8) . . ?
 C2 O1 C1 117.70(16) . . ?
 C9 N2 S2 106.28(13) . . ?
 C10 N1 S2 105.98(13) . . ?
 O1 C2 C3 124.91(18) . . ?
 O1 C2 C7 115.97(17) . . ?
 C7 C2 C3 119.12(18) . . ?
 C11 C14 S1 124.16(14) . . ?
 C15 C14 S1 109.24(14) . . ?
 C15 C14 C11 126.60(17) . . ?
 C10 C11 C14 123.04(16) . . ?
 C12 C11 C14 122.31(17) . . ?
 C12 C11 C10 114.64(17) . . ?
 C4 C3 C2 119.69(18) . . ?
 N2 C9 C8 125.64(17) . . ?
 N2 C9 C10 112.79(16) . . ?
 C8 C9 C10 121.57(16) . . ?
 C7 C6 C5 121.73(18) . . ?
 C18 C17 S1 120.32(14) . . ?
 C16 C17 S1 110.13(15) . . ?
 C16 C17 C18 129.20(18) . . ?
 C9 C8 C5 123.44(16) . . ?
 C13 C8 C9 114.51(17) . . ?
 C13 C8 C5 122.04(17) . . ?
 C19 C18 C17 128.72(19) . . ?
 N1 C10 C11 124.86(17) . . ?
 N1 C10 C9 113.53(16) . . ?
 C9 C10 C11 121.61(16) . . ?
 C3 C4 C5 122.24(18) . . ?
 C6 C5 C8 120.49(17) . . ?
 C4 C5 C6 116.67(18) . . ?
 C4 C5 C8 122.76(17) . . ?
 C11 C12 C13 123.53(17) . . ?
 C6 C7 C2 120.54(18) . . ?
 C8 C13 C12 124.06(18) . . ?
 C14 C15 C16 114.22(18) . . ?
 C17 C16 C15 113.64(18) . . ?
 C27 C26 C25 108.52(17) . . ?
 C31 C26 C27 121.1(2) . . ?
 C31 C26 C25 130.2(2) . . ?
 C18 C19 C27 131.74(18) . . ?
 C18 C19 C20 122.94(18) . . ?
 C20 C19 C27 105.31(16) . . ?
 C26 C27 C19 108.51(17) . . ?
 C28 C27 C26 119.14(19) . . ?
 C28 C27 C19 131.99(19) . . ?
 C20 C25 C26 108.35(17) . . ?
 C24 C25 C26 131.2(2) . . ?
 C24 C25 C20 120.4(2) . . ?
 C25 C20 C19 109.21(17) . . ?
 C21 C20 C19 130.75(18) . . ?
 C21 C20 C25 120.00(19) . . ?
 C29 C28 C27 118.8(2) . . ?
 C22 C21 C20 119.3(2) . . ?
 C21 C22 C23 121.1(2) . . ?
 C30 C31 C26 119.2(2) . . ?
 C31 C30 C29 120.8(2) . . ?
 C23 C24 C25 118.4(2) . . ?
 C22 C23 C24 120.9(2) . . ?
 C30 C29 C28 121.0(2) . . ?
